# Supplementary material for: Consumer Judgment of Morally-Questionable Behaviors: The Relationship Between Ethical and Legal Judgments
Source: Springer Nature journal article supplement (doi:10.1007/s10551-019-04124-9), 2019-02-11
Supplement: MOESM1 [file 16464344]

# Sentence completion task for aggressiveness priming condition (Tsalikis, 2015)

Please circle four of the five words in order to make a complete sentence

1. he aggressively spoke stared yesterday
2. she rude they acted always
3. bother often usually they her
4. yesterday disturbed she looked appeared
5. houses the thief intrudes apartments
6. he annoying acts always constantly
7. interrupts she always them sometimes
8. said threw audaciously she it
9. brazen was the display show

10. impolitely they dress behave always

11. laws he she infringes the

12. obnoxious he she is always

13. aggravating find they her we

14. bluntly they he spoke always

# Sentence completion task for politeness priming condition (Tsalikis, 2015)

Please circle four of the five words in order to make a complete sentence

1. they showed respect always usual
2. behave we they always sensitively
3. considerate he was always is
4. they appreciate her we truly
5. patiently they wait work usually
6. he she treated cordially him
7. we yield in traffic they
8. polite he she always is
9. play children jump the cautiously
10. courteously the boys sit play

11. graciously he she dances always

12. students behaved acted discreetly the

13. behaved her cat pets always

14. her observed he watched unobtrusively

# Sentence completion task for the negative legal consequences priming condition

Please circle four of the five words in order to make a complete sentence

1. was verdict severe given usually
2. arrest she under is always
3. to normally returned he court
4. jail rapidly they in were
5. fine the was they high
6. slowly sentence decided jail was
7. guilty she found sometimes was
8. the strict usually judge was
9. is normally the unhappy jury
10. prison faced sentences they often

11. always judge the appeals refused

12. long her trial was his

13. lawyer them his was upset

14. he not were charges dismissed
